# Supplementary material
Source: PubMed Central journal article supplement (PMC5913933)
Supplement: AAC.02055-17_zac004187039s1.pdf [file AAC.02055-17_zac004187039s1.pdf]

## Supplemental Material:

### Mechanism-based modeling methods

The final model included three subpopulations that represented susceptible bacteria ( $CFU_{SS}$ ), intermediate bacteria ( $CFU_{IR}$ , meropenem intermediate, tobramycin resistant) and resistant bacteria ( $CFU_{RI}$ , meropenem resistant, tobramycin intermediate). The proportions of intermediate and resistant bacteria present in the initial inoculum were estimated ( $\text{Log}_{10}$  proportion of resistant bacteria<sub>IR</sub> [ $\text{LogPRB}_{IR}$ ], and  $\text{Log}_{10}$  proportion of resistant bacteria<sub>RI</sub> [ $\text{LogPRB}_{RI}$ ]). These model-estimated less-susceptible subpopulations did not directly reflect the observed bacterial counts on agar containing 2.5× and 10× the meropenem and tobramycin MIC. For each subpopulation, a life-cycle growth model described bacterial growth and replication. The model included bacteria that are preparing for replication (state 1) and bacteria immediately before the replication step (state 2). The first-order growth rate constant  $k_{12}$  described transition from state 1 to state 2, where  $k_{12} = 60/\text{MGT}$  and MGT was mean generation time. The replication constant  $k_{21}$  was assumed to be fast. The total concentration of all viable bacteria ( $CFU_{ALL}$ ) was described as:

$$CFU_{ALL} = CFU_{SS1} + CFU_{SS2} + CFU_{IR1} + CFU_{IR2} + CFU_{RI1} + CFU_{RI2} \quad (1)$$

A direct bacterial killing process with a Hill function was used to describe the killing by each antibiotic as the rates of bacterial killing by high concentrations of meropenem and tobramycin or by their synergistic combinations were faster than the bacterial growth rate. The differential equation for the concentration of bacteria in state 1 of the susceptible population ( $CFU_{SS1}$ ) incorporated killing by meropenem ( $C_{MEM}$ ) and tobramycin ( $C_{TOB}$ ):

$$\frac{d(CFU_{SS1})}{dt} = \text{REP} \cdot k_{21} \cdot CFU_{SS2} - k_{12SS} \cdot CFU_{SS1} - \left( \frac{K_{\max, MEM, SS} \cdot C_{MEM}^{\text{Hill}_{MEM}}}{C_{MEM}^{\text{Hill}_{MEM}} + (\text{OM\_effect} \cdot KC_{50, MEM, SS})^{\text{Hill}_{MEM}}} + \frac{K_{\max, TOB, SS} \cdot C_{TOB}^{\text{Hill}_{TOB}}}{C_{TOB}^{\text{Hill}_{TOB}} + KC_{50, TOB, SS}^{\text{Hill}_{TOB}}} \right) \cdot CFU_{SS1} \quad (2)$$

where REP is the replication factor which ensures that  $CFU_{ALL}$  cannot exceed the maximum population size  $CFU_{\max}$ :

$$REP = 2 \cdot \left(1 - \frac{CFU_{ALL}}{CFU_{max} + CFU_{ALL}}\right) \quad (3)$$

At low  $CFU_{ALL}$ ,  $REP$  approaches 2 which represents a 100% probability of successful replication. As  $CFU_{ALL}$  approaches  $CFU_{max}$ ,  $REP$  approaches 1. This represents a 50% probability of successful replication where bacteria continue to transition between states 1 and 2 but the total viable count remains constant. The maximum killing rate constant for meropenem ( $K_{max, MEM, SS}$ ), the meropenem concentration causing 50% of  $K_{max}$  for the susceptible population ( $KC_{50, MEM, SS}$ ), and the Hill coefficient for meropenem ( $Hill_{MEM}$ ) affected both states 1 and 2 of the population. The maximum killing rate constant for tobramycin was  $K_{max, TOB, SS}$  and the tobramycin concentration causing 50% of  $K_{max}$  was  $KC_{50, TOB, SS}$ . The ability of tobramycin to permeabilize the outer membrane ( $OM\_effect$ ; *i.e.* the synergy term) is described in equation 5 below. State 2 of population 1 ( $CFU_{SS2}$ ) was described as:

$$\frac{d(CFU_{SS2})}{dt} = -k_{21} \cdot CFU_{SS2} + k_{12SS} \cdot CFU_{SS1} - \left( \frac{K_{max, MEM, SS} \cdot C_{MEM}^{Hill_{MEM}}}{C_{MEM}^{Hill_{MEM}} + (OM\_effect \cdot KC_{50, MEM, SS})^{Hill_{MEM}}} + \frac{K_{max, TOB, SS} \cdot C_{TOB}^{Hill_{TOB}}}{C_{TOB}^{Hill_{TOB}} + KC_{50, TOB, SS}^{Hill_{TOB}}} \right) \cdot CFU_{SS2} \quad (4)$$

The differential equations for the  $CFU_{IR}$  and  $CFU_{RI}$  populations had the same structure as for  $CFU_{SS}$ , but different parameters for  $k_{12}$ ,  $K_{max, MEM}$ ,  $KC_{50, MEM}$ ,  $K_{max, TOB}$  and  $KC_{50, TOB}$  as described previously.

***Mechanism-based modeling of synergy:*** Mechanistic synergy (*i.e.* one antibiotic enhancing the killing by the other antibiotic against one or multiple bacterial populations) was incorporated by assuming that disruption of the bacterial outer membrane by tobramycin increases the target site penetration of meropenem. The term  $OM\_effect$  described the effect of tobramycin on decreasing the  $KC_{50, MEM}$ :

$$OM\_effect = 1 - \left( \frac{I_{max, OM} \cdot C_{TOB}^{Hill_{OM}}}{C_{TOB}^{Hill_{OM}} + IC_{50, OM}^{Hill_{OM}}} \right) \quad (5)$$

The  $\log_{10}$  bacterial counts were fitted using an additive residual error model on  $\log_{10}$  scale. For counts below 100 CFU/mL (<10 colonies/plate), a previously developed residual error model was utilized to fit the number of colonies per plate.

**TABLE S1** Log<sub>10</sub> mutation frequencies at 2.5 mg/liter meropenem (2.5× MIC) and 5 mg/liter tobramycin (10× MIC) at various time points for each concentration (monotherapy and combinations) in the SCTK.<sup>a</sup>

|                |                  | Time (h)         | Control | TOB 1 (mg/liter) | TOB 4 (mg/liter) | TOB 8 (mg/liter) | MEM 2 (mg/liter) | MEM 8 (mg/liter) | MEM 16 (mg/liter) | TOB 1 + MEM 2 (mg/liter) | TOB 1 + MEM 8 (mg/liter) | TOB 1 + MEM 16 (mg/liter) | TOB 4 + MEM 2 (mg/liter) | TOB 4 + MEM 8 (mg/liter) | TOB 4 + MEM 16 (mg/liter) | TOB 8 + MEM 2 (mg/liter) | TOB 8 + MEM 8 (mg/liter) | TOB 8 + MEM 16 (mg/liter) |        |
|----------------|------------------|------------------|---------|------------------|------------------|------------------|------------------|------------------|-------------------|--------------------------|--------------------------|---------------------------|--------------------------|--------------------------|---------------------------|--------------------------|--------------------------|---------------------------|--------|
| PAO1 WT        | MEM 2.5 mg/liter | 24               | -7.04   | -                | -                | -                | -1.78            | <-2.58           | <-2.61            | <-4.34                   | <-1.51                   | <-1.41                    | <-3.16                   | <-1.53                   | <-1.38                    | <-2.59                   | <-1.20                   | <0.70                     |        |
|                |                  | 48               | -6.55   | -                | -                | -                | -0.31            | <-1.56           | <-1.38            | <-2.46                   | <0.70                    | <0.70                     | <0.70                    | <0.70                    | <0.70                     | <0.70                    | <0.70                    | <0.70                     |        |
|                |                  | 96               | -6.64   | -                | -                | -                | -0.26            | -2.07            | <0.70             | -2.39                    | <-1.40                   | <-1.55                    | -0.46                    | <0.70                    | <-0.12                    | <0.70                    | <0.70                    | <-2.62                    |        |
|                | TOB 5 mg/liter   | 24               | <-9.29  | -4.89            | -1.10            | -0.63            | -                | -                | -                 | <-4.34                   | <-1.51                   | <-1.41                    | <-3.16                   | <-1.53                   | <-1.38                    | <-2.59                   | <-1.20                   | <0.70                     |        |
|                |                  | 48               | <-9.08  | -5.49            | -4.14            | -2.61            | -                | -                | -                 | <-2.46                   | <0.70                    | <0.70                     | <0.70                    | <0.70                    | <0.70                     | <0.70                    | <0.70                    | <0.70                     |        |
|                |                  | 96               | -7.10   | -6.34            | -4.72            | -1.33            | -                | -                | -                 | <-1.73                   | -2.06                    | -2.20                     | -2.31                    | <0.70                    | <-0.12                    | <0.70                    | <0.70                    | <-2.62                    |        |
|                | PAOΔmutS         | MEM 2.5 mg/liter | 24      | -4.96            | -                | -                | -                | -0.05            | -0.89             | <-2.56                   | -1.88                    | <-2.02                    | <-1.97                   | -3.76                    | <-3.72                    | <-1.53                   | -3.89                    | <2.37                     | <-1.34 |
|                |                  |                  | 48      | -5.45            | -                | -                | -                | -0.12            | -0.52             | <-1.82                   | -0.33                    | <0.70                     | <-0.30                   | -1.92                    | <-1.26                    | <0.70                    | <-1.75                   | <-0.30                    | <0.70  |
|                |                  |                  | 96      | -6.82            | -                | -                | -                | -0.14            | -0.01             | -2.57                    | -0.07                    | <-1.92                    | -3.78                    | -1.63                    | <-1.77                    | <-3.92                   | <-1.94                   | <0.70                     | <0.70  |
| TOB 5 mg/liter |                  | 24               | -6.68   | -5.05            | -2.95            | -2.85            | -                | -                | -                 | <-4.23                   | <-2.02                   | <-1.97                    | <-4.54                   | <-3.72                   | <-1.53                    | <-3.89                   | <-2.37                   | <-1.34                    |        |
|                |                  | 48               | -6.18   | -4.93            | -1.20            | -1.20            | -                | -                | -                 | -2.47                    | <0.70                    | <-0.30                    | -0.41                    | <-1.26                   | <0.70                     | -1.27                    | <-0.30                   | <0.70                     |        |
|                |                  | 96               | -8.82   | -5.46            | -2.30            | -4.14            | -                | -                | -                 | -4.68                    | <-1.92                   | -2.44                     | 0.04                     | <-1.77                   | <-3.92                    | -0.05                    | <0.70                    | <0.70                     |        |

TOB, tobramycin; MEM, meropenem.

<sup>a</sup> When no colonies were present on antibiotic-containing plates, mutation frequencies reported represent an upper limit based on the total viable count.

**TABLE S2** Log<sub>10</sub> changes in viable counts at various time points for each concentration (monotherapy and combinations) in the SCKT. TOB, tobramycin; MEM, meropenem. A grey background indicates synergy (a  $\geq 2$ -log<sub>10</sub> decrease in the number of CFU/ml with the combination compared to its most active component).

|          | Time (h) | Control | TOB 1 (mg/liter) | TOB 4 (mg/liter) | TOB 8 (mg/liter) | MEM 2 (mg/liter) | MEM 8 (mg/liter) | MEM 16 (mg/liter) | TOB 1 + MEM 2 (mg/liter) | TOB 1 + MEM 8 (mg/liter) | TOB 1 + MEM 16 (mg/liter) | TOB 4 + MEM 2 (mg/liter) | TOB 4 + MEM 8 (mg/liter) | TOB 4 + MEM 16 (mg/liter) | TOB 8 + MEM 2 (mg/liter) | TOB 8 + MEM 8 (mg/liter) | TOB 8 + MEM 16 (mg/liter) |
|----------|----------|---------|------------------|------------------|------------------|------------------|------------------|-------------------|--------------------------|--------------------------|---------------------------|--------------------------|--------------------------|---------------------------|--------------------------|--------------------------|---------------------------|
| PAO1 WT  | 1        | 0.35    | -0.56            | -2.53            | -2.93            | -0.11            | -0.81            | -1.08             | -1.19                    | -1.27                    | -1.32                     | -2.81                    | -2.85                    | -2.67                     | -3.00                    | -3.09                    | -3.30                     |
|          | 3        | 1.16    | -2.04            | -3.11            | -3.30            | -1.17            | -2.52            | -2.67             | -2.86                    | -2.88                    | -3.25                     | -3.16                    | -3.11                    | -3.08                     | -3.82                    | -3.74                    | -4.58                     |
|          | 6        | 1.39    | -2.19            | -3.73            | -4.08            | -2.58            | -2.76            | -2.86             | -3.14                    | -3.71                    | -3.93                     | -4.00                    | -4.63                    | -4.13                     | -4.95                    | -4.96                    | -5.26                     |
|          | 24       | 2.20    | 1.17             | -1.85            | -3.09            | -3.29            | -4.52            | -4.49             | -2.75                    | -5.59                    | -5.68                     | -3.93                    | -5.56                    | -5.71                     | -4.50                    | -5.89                    | -7.79                     |
|          | 29       | 1.35    | 1.29             | -1.67            | -2.63            | -4.04            | -4.87            | -4.87             | -3.86                    | -6.32                    | -7.79                     | -5.45                    | -7.79                    | -7.79                     | -6.79                    | -7.79                    | -7.79                     |
|          | 48       | 1.99    | 1.92             | 1.41             | -1.22            | -3.56            | -5.54            | -5.71             | -4.63                    | -7.79                    | -7.79                     | -7.79                    | -7.79                    | -7.79                     | -7.79                    | -7.79                    | -7.79                     |
|          | 72       | 2.30    | 2.22             | 2.10             | 1.32             | -2.52            | -6.32            | -7.79             | -6.79                    | -7.79                    | -7.79                     | -6.49                    | -7.79                    | -7.79                     | -7.79                    | -7.79                    | -7.79                     |
|          | 96       | 2.11    | 2.03             | 1.44             | 0.96             | 0.64             | -7.79            | -7.79             | -7.79                    | -6.79                    | -7.79                     | -7.79                    | -7.79                    | -7.79                     | -7.79                    | -7.79                    | -7.79                     |
| PAOΔmutS | 1        | 0.51    | -0.06            | -1.71            | -2.54            | -0.01            | -0.66            | -0.70             | -0.62                    | -0.89                    | -1.17                     | -2.13                    | -2.54                    | -2.45                     | -2.91                    | -2.66                    | -2.70                     |
|          | 3        | 1.31    | -0.67            | -2.45            | -2.82            | -0.61            | -1.58            | -0.54             | -2.06                    | -2.18                    | -2.73                     | -2.66                    | -2.60                    | -2.71                     | -3.49                    | -3.09                    | -3.54                     |
|          | 6        | 1.45    | -0.75            | -2.77            | -3.64            | -1.53            | -2.61            | -2.64             | -2.87                    | -3.77                    | -3.80                     | -3.35                    | -3.38                    | -3.64                     | -3.85                    | -3.91                    | -4.84                     |
|          | 24       | 2.18    | 1.78             | 1.45             | 1.19             | 1.35             | -3.18            | -4.41             | -2.74                    | -4.95                    | -4.99                     | -2.43                    | -3.25                    | -5.43                     | -3.07                    | -4.60                    | -5.62                     |
|          | 29       | 1.36    | 1.42             | 0.88             | 1.18             | 1.35             | -4.53            | -4.58             | -3.65                    | -5.71                    | -5.82                     | -4.49                    | -4.72                    | -6.66                     | -4.85                    | -6.18                    | -7.66                     |
|          | 48       | 2.43    | 2.18             | 2.24             | 2.15             | 2.17             | -0.85            | -5.14             | -3.54                    | -7.66                    | -6.66                     | -4.34                    | -5.71                    | -7.66                     | -5.21                    | -6.66                    | -7.66                     |
|          | 72       | 2.39    | 2.43             | 1.54             | 1.58             | 1.62             | 0.77             | -5.96             | -1.73                    | -7.66                    | -5.58                     | -4.34                    | -6.66                    | -7.66                     | -5.76                    | -7.66                    | -7.66                     |
|          | 96       | 2.10    | 2.09             | 2.01             | 1.64             | 2.12             | 1.03             | -5.32             | 1.27                     | -7.66                    | -5.28                     | -4.04                    | -7.66                    | -7.66                     | -5.25                    | -7.66                    | -7.66                     |

**TABLE S3** Population parameter estimates for meropenem and tobramycin in SCKT against PAO1 and PAO $\Delta$ mutS

| Parameter                                               | Symbol (unit)                                | Population mean (SE [%])                                |
|---------------------------------------------------------|----------------------------------------------|---------------------------------------------------------|
| <b><i>Bacterial growth and subpopulations</i></b>       |                                              |                                                         |
| Log <sub>10</sub> CFU initial inoculum                  | Log <sub>10</sub> CFU <sub>0</sub>           | 7.72 (1.0)                                              |
| Mean generation time                                    |                                              |                                                         |
| susceptible population                                  | MGT <sub>SS</sub> (min)                      | 57.3 (11.2)                                             |
| intermediate population                                 | MGT <sub>RI</sub> (min)                      | 2341 (10.5)                                             |
| resistant population                                    | MGT <sub>IR</sub> (min)                      | 78.4 (4.7)                                              |
| Log <sub>10</sub> CFU maximum population size           | Log <sub>10</sub> CFU <sub>max</sub>         | 9.57 (1.4)                                              |
| Log <sub>10</sub> (proportion of resistant bacteria)    |                                              |                                                         |
| intermediate population                                 | Log <sub>10</sub> PRB <sub>RI</sub>          | -8.53 (3.3) <sup>a</sup> ,<br>-7.63 (2.2) <sup>b</sup>  |
| resistant population                                    | Log <sub>10</sub> PRB <sub>IR</sub>          | -3.08 (3.6) <sup>a</sup> ,<br>-2.99 (4.3) <sup>b</sup>  |
| <b><i>Bacterial killing by meropenem</i></b>            |                                              |                                                         |
| Maximum killing rate constant                           |                                              |                                                         |
| susceptible population                                  | K <sub>max, MEM, SS</sub> (h <sup>-1</sup> ) | 3.77 (18.6) <sup>a</sup> ,<br>2.81 (17.9) <sup>b</sup>  |
| intermediate population <sup>c</sup>                    | K <sub>max, MEM, RI</sub> (h <sup>-1</sup> ) | 0.652 (14.9) <sup>a</sup> ,<br>0.458 (9.5) <sup>b</sup> |
| resistant population <sup>d</sup>                       | K <sub>max, MEM, IR</sub> (h <sup>-1</sup> ) | 3.92 (17.2) <sup>a</sup> ,<br>1.69 (12.4) <sup>b</sup>  |
| Meropenem concentration causing 50% of K <sub>max</sub> |                                              |                                                         |
| susceptible population                                  | KC <sub>50, MEM, SS</sub> (mg/liter)         | 2.07 (16)                                               |
| intermediate population                                 | KC <sub>50, MEM, RI</sub> (mg/liter)         | 81.2 (17.2)                                             |

|                      |                               |                                                        |
|----------------------|-------------------------------|--------------------------------------------------------|
| resistant population | $KC_{50, MEM, IR}$ (mg/liter) | 61.5 (15.5) <sup>a</sup> ,<br>40.0 (13.9) <sup>b</sup> |
| Hill coefficient     | $Hill_{MEM}$                  | 0.563 (18.9)                                           |

### ***Bacterial killing by tobramycin***

Maximum killing rate constant

|                                                   |                                 |                                                          |
|---------------------------------------------------|---------------------------------|----------------------------------------------------------|
| susceptible population                            | $K_{max, TOB, SS}$ ( $h^{-1}$ ) | 7.03 (16.7) <sup>a</sup> ,<br>5.73 (12.3) <sup>b</sup>   |
| intermediate population                           | $K_{max, TOB, RI}$ ( $h^{-1}$ ) | 0.624 (26.8) <sup>a</sup> ,<br>0.182 (23.4) <sup>b</sup> |
| resistant population                              | $K_{max, TOB, IR}$ ( $h^{-1}$ ) | 0.156 (21.8)                                             |
| Tobramycin concentration causing 50% of $K_{max}$ |                                 |                                                          |
| susceptible population                            | $KC_{50, TOB, SS}$ (mg/liter)   | 1.62 (20.2)                                              |
| intermediate population                           | $KC_{50, TOB, RI}$ (mg/liter)   | 31.0 (14.8)                                              |
| resistant population                              | $KC_{50, TOB, IR}$ (mg/liter)   | 92.8 (7.4)                                               |
| Hill coefficient                                  | $Hill_{TOB}$                    | 3.03 (12.9)                                              |

### ***Synergistic bacterial killing***

Maximum fractional decrease of  $KC_{50, MER}$  by tobramycin  
*via* outer membrane disruption

|                                                       |                          |                  |
|-------------------------------------------------------|--------------------------|------------------|
|                                                       | $I_{max, OM}$            | 1.0 <sup>e</sup> |
| Tobramycin concentration causing 50% of $I_{max, OM}$ | $IC_{50, OM}$ (mg/liter) | 0.587 (19.5)     |

### ***Residual variability***

|                                                    |            |            |
|----------------------------------------------------|------------|------------|
| SD of additive residual error on $\log_{10}$ scale | $SD_{CFU}$ | 0.41 (5.6) |
|----------------------------------------------------|------------|------------|

<sup>a</sup> parameter estimates for strain PAO1, <sup>b</sup> parameter estimates for strain PAO $\Delta mutS$ , <sup>c</sup> TOB<sup>I</sup> / MEM<sup>R</sup>, <sup>d</sup> TOB<sup>R</sup> / MEM<sup>I</sup>, <sup>e</sup> fixed.

**TABLE S4** Log<sub>10</sub> mutation frequencies at 2.5 and 5 mg/liter meropenem (2.5× and 5× MIC) and 2.5 mg/liter tobramycin (5× MIC) at various time points for each dosage regimen (monotherapy and combinations) for PAO1 in the HFIM. <sup>a</sup> MEM, meropenem; TOB, tobramycin.

|                                    | Time (h) | Control | MEM 1 g<br>8-hourly | MEM 3<br>g/day CI | TOB<br>10 mg/kg<br>24-hourly | MEM 1 g<br>8-hourly<br>+ TOB | MEM 3<br>g/day CI +<br>TOB |
|------------------------------------|----------|---------|---------------------|-------------------|------------------------------|------------------------------|----------------------------|
| <b>MEM 2.5 mg/liter (2.5× MIC)</b> | 0        | -5.95   | -5.95               | -5.95             | -                            | -5.95                        | -5.95                      |
|                                    | 5        | -7.62   | < -5.57             | < -6.16           | -                            | < -1.64                      | < -1.45                    |
|                                    | 23       | -7.07   | < -3.94             | < -3.58           | -                            | < -2.08                      | < -1.26                    |
|                                    | 47       | -7.61   | < -2.98             | < -3.09           | -                            | < -0.60                      | < 0.70                     |
|                                    | 71       | -7.20   | < -2.28             | < -2.00           | -                            | < -0.30                      | < 0.70                     |
|                                    | 95       | -8.58   | < -2.51             | < -3.09           | -                            | < -1.64                      | < 0.70                     |
|                                    | 119      | -7.03   | < -2.66             | < -1.85           | -                            | < 0.70                       | < 0.70                     |
|                                    | 143      | -       | -                   | -                 | -                            | < 0.70                       | < 0.70                     |
|                                    | 167      | -6.58   | -1.07               | < -1.26           | -                            | < -0.48                      | < 0.70                     |
|                                    | 191      | -       | -                   | -                 | -                            | < -1.00                      | < 0.70                     |
|                                    | 215      | -7.17   | 1.58                | < -1.08           | -                            | < 0.70                       | < 0.70                     |
|                                    | 239      | -7.13   | -0.23               | < -4.01           | -                            | < 0.70                       | < 0.70                     |
| <b>MEM 5 mg/liter (5× MIC)</b>     | 0        | < -7.71 | < -7.71             | < -7.71           | -                            | < -7.71                      | < -7.71                    |
|                                    | 5        | < -9.08 | < -5.57             | < -6.16           | -                            | < -1.64                      | < -1.45                    |
|                                    | 23       | -8.36   | < -3.94             | < -3.58           | -                            | < -2.08                      | < -1.26                    |
|                                    | 47       | -6.40   | < -2.98             | < -3.09           | -                            | < -0.60                      | < 0.70                     |
|                                    | 71       | < -9.65 | < -8.04             | < -2.28           | -                            | < -0.30                      | < 0.70                     |
|                                    | 95       | -6.29   | < -2.51             | < -3.09           | -                            | < -1.64                      | < 0.70                     |
|                                    | 119      | -7.55   | < -2.66             | < -1.85           | -                            | < 0.70                       | < 0.70                     |
|                                    | 143      | -       | -                   | -                 | -                            | < 0.70                       | < 0.70                     |
|                                    | 167      | -6.62   | -0.84               | < -1.26           | -                            | < -0.48                      | < 0.70                     |
|                                    | 191      | -       | -                   | -                 | -                            | < -0.48                      | < 0.70                     |
|                                    | 215      | -7.02   | 1.57                | < -1.08           | -                            | < 0.70                       | < 0.70                     |
|                                    | 239      | -6.95   | -0.30               | < -4.01           | -                            | < 0.70                       | < 0.70                     |
| <b>TOB 2.5 mg/liter (5× MIC)</b>   | 0        | -7.11   | -                   | -                 | -7.11                        | -7.11                        | -7.11                      |
|                                    | 5        | -7.70   | -                   | -                 | < -2.72                      | < -1.64                      | < -1.45                    |
|                                    | 23       | -8.27   | -                   | -                 | < -1.08                      | < -2.08                      | < -1.26                    |
|                                    | 47       | -7.74   | -                   | -                 | -0.52                        | < -0.60                      | < 0.70                     |
|                                    | 71       | -7.19   | -                   | -                 | -1.81                        | < -0.30                      | < 0.70                     |
|                                    | 95       | -7.19   | -                   | -                 | -2.42                        | < -1.64                      | 1.60                       |
|                                    | 119      | -7.37   | -                   | -                 | -2.16                        | < 0.70                       | < 0.70                     |
|                                    | 143      | -       | -                   | -                 | -                            | < 0.70                       | < 0.70                     |
|                                    | 167      | -7.05   | -                   | -                 | -2.95                        | < -0.48                      | < 0.70                     |
|                                    | 191      | -       | -                   | -                 | -                            | < -1.00                      | < 0.70                     |
|                                    | 215      | -7.52   | -                   | -                 | -2.03                        | < 0.70                       | < 0.70                     |
|                                    | 239      | -7.57   | -                   | -                 | -2.51                        | < 0.70                       | 1.00                       |

<sup>a</sup> When no colonies were present on antibiotic-containing plates, mutation frequencies reported represent an upper limit based on the total viable count.



**TABLE S5** Log<sub>10</sub> mutation frequencies at 2.5 and 5 mg/liter meropenem (2.5× and 5× MIC) and 2.5 mg/liter tobramycin (5× MIC) at various time points for each dosage regimen (monotherapy and combinations) for PAOΔ*mutS* in the HFIM. <sup>a</sup> MEM, meropenem; TOB, tobramycin.

|                             | Time (h) | Control | MEM 1 g<br>8-hourly | MEM 3<br>g/day CI | TOB<br>10 mg/kg<br>24-hourly | MEM 1 g<br>8-hourly<br>+ TOB | MEM 3<br>g/day CI +<br>TOB |
|-----------------------------|----------|---------|---------------------|-------------------|------------------------------|------------------------------|----------------------------|
| MEM 2.5 mg/liter (2.5× MIC) | 0        | -3.38   | -3.38               | -3.38             | -                            | -3.38                        | -3.38                      |
|                             | 5        | -4.14   | -4.20               | -3.91             | -                            | -3.05                        | -2.91                      |
|                             | 23       | -4.12   | -0.53               | -0.23             | -                            | -2.78                        | < -2.42                    |
|                             | 47       | -3.43   | -0.95               | -0.71             | -                            | < -2.12                      | -2.06                      |
|                             | 71       | -3.73   | -0.61               | -0.85             | -                            | 1.08                         | 0.48                       |
|                             | 95       | -3.59   | -0.64               | -0.91             | -                            | -0.91                        | < -1.65                    |
|                             | 119      | -3.16   | -0.96               | -0.40             | -                            | -0.65                        | < -0.7                     |
|                             | 143      | -       | -                   | -                 | -                            | -0.055                       | < -0.6                     |
|                             | 167      | -2.77   | -0.56               | -0.52             | -                            | -0.87                        | < 0.7                      |
|                             | 191      | -       | -                   | -                 | -                            | 0.014                        | < -0.7                     |
|                             | 215      | -3.18   | -0.03               | 0.02              | -                            | -0.52                        | -0.48                      |
|                             | 239      | -3.222  | -0.225              | 0.161             | -                            | -0.092                       | < 0.7                      |
| MEM 5 mg/liter (5× MIC)     | 0        | -5.95   | -5.95               | -5.95             | -                            | -5.95                        | -5.95                      |
|                             | 5        | -6.24   | -5.46               | -5.46             | -                            | < -3.89                      | < -3.95                    |
|                             | 23       | -6.55   | -1.10               | -0.24             | -                            | < -2.78                      | < -2.42                    |
|                             | 47       | -6.24   | -1.53               | -0.69             | -                            | -1.82                        | -2.06                      |
|                             | 71       | -6.71   | -0.89               | -1.18             | -                            | < 0                          | < -0.6                     |
|                             | 95       | -6.89   | -0.88               | -1.26             | -                            | -2.74                        | < -1.65                    |
|                             | 119      | -6.93   | -0.97               | -1.22             | -                            | -2.00                        | < -0.7                     |
|                             | 143      | -       | -                   | -                 | -                            | -1.75                        | < -0.6                     |
|                             | 167      | -5.73   | -0.79               | -0.61             | -                            | -1.75                        | < 0.7                      |
|                             | 191      | -       | -                   | -                 | -                            | -1.06                        | < -0.7                     |
|                             | 215      | -6.11   | -0.87               | -0.84             | -                            | -1.29                        | -0.48                      |
|                             | 239      | -6.28   | -0.06               | 0.43              | -                            | -1.04                        | < 0.7                      |
| TOB 2.5 mg/liter (5× MIC)   | 0        | -6.51   | -                   | -                 | -6.51                        | -6.51                        | -6.51                      |
|                             | 5        | -6.12   | -                   | -                 | < -3.38                      | < -3.89                      | < -3.95                    |
|                             | 23       | -6.22   | -                   | -                 | -2.12                        | < -2.78                      | < -2.42                    |
|                             | 47       | -5.93   | -                   | -                 | -0.14                        | < -2.12                      | -2.37                      |
|                             | 71       | -6.32   | -                   | -                 | -0.95                        | < 0                          | < -0.6                     |
|                             | 95       | -6.58   | -                   | -                 | -1.21                        | -2.68                        | -1.18                      |
|                             | 119      | -7.07   | -                   | -                 | -1.26                        | -2.85                        | < -0.7                     |
|                             | 143      | -       | -                   | -                 | -                            | -2.95                        | < -0.6                     |
|                             | 167      | -6.36   | -                   | -                 | -1.33                        | -2.61                        | < 0.7                      |
|                             | 191      | -       | -                   | -                 | -                            | -2.57                        | < -0.7                     |
|                             | 215      | -7.73   | -                   | -                 | -1.72                        | -2.28                        | < -0.48                    |
|                             | 239      | -7.24   | -                   | -                 | -1.43                        | -2.52                        | < 0.7                      |

<sup>a</sup> When no colonies were present on antibiotic-containing plates, mutation frequencies reported represent an upper limit based on the total viable count.

**TABLE S6** MIC values from colonies obtained from drug-containing agar plates (meropenem at 2.5 and 5 mg/liter, equivalent to 2.5× and 5× MIC; tobramycin at 2.5 mg/liter, equivalent to 5× MIC) before treatment (0 h) and at various times for each dosage regimen and bacterial strain simulated in the HFIM.

| Treatment                                          | Time (h) | Meropenem                      |                      | Time (h) | Tobramycin                       |      |
|----------------------------------------------------|----------|--------------------------------|----------------------|----------|----------------------------------|------|
|                                                    |          | 5 mg/liter<br>PAOΔ <i>mutS</i> | 2.5 mg/liter<br>PAO1 |          | 2.5 mg/liter<br>PAOΔ <i>mutS</i> | PAO1 |
|                                                    | 0        | 8                              | 4                    | 0        | 4                                | 8    |
| Control                                            | 95       | 32                             | -                    | 95       | 8                                | 4    |
|                                                    | 215      | 16                             | 4 <sup>a</sup>       | 239      | 8                                | 1    |
| MEM 1 g<br>8-hourly                                | 95       | 32                             | -                    | .        | .                                | .    |
|                                                    | 215      | 32                             | 32 <sup>b</sup>      | .        | .                                | .    |
| MEM 3 g CI                                         | 95       | 64                             | -                    | .        | .                                | .    |
|                                                    | 215      | 64                             | -                    | .        | .                                | .    |
| TOB 10 mg/kg<br>24-hourly                          | .        | .                              | .                    | 95       | 16                               | 8    |
|                                                    | .        | .                              | .                    | 239      | 32                               | 8    |
| MEM 1 g<br>8-hourly +<br>TOB 10 mg/kg<br>24-hourly | 95       | 32                             | -                    | 95       | 8                                | -    |
|                                                    | 215      | 32                             | -                    | 239      | 8                                | -    |
| MEM 3 g CI +<br>TOB 10 mg/kg<br>24-hourly          | 95       | -                              | -                    | 95       | 32                               | 8    |
|                                                    | 215      | 32                             | -                    | 239      | -                                | -    |

- , no colonies on antibiotic-containing plates.

<sup>a</sup> The MIC was determined at 167 h.

<sup>b</sup> The MIC was 32 mg/liter at both 167 h and 239 h. MEM, meropenem; TOB, tobramycin

**FIG S1** Time-course of the total and less susceptible bacterial populations (*i.e.* able to grow in the presence of meropenem 2.5 mg/liter or tobramycin 5 mg/liter) of PAO1 for each concentration (monotherapy and combinations) in the SCK. MEM, meropenem. TOB, tobramycin.

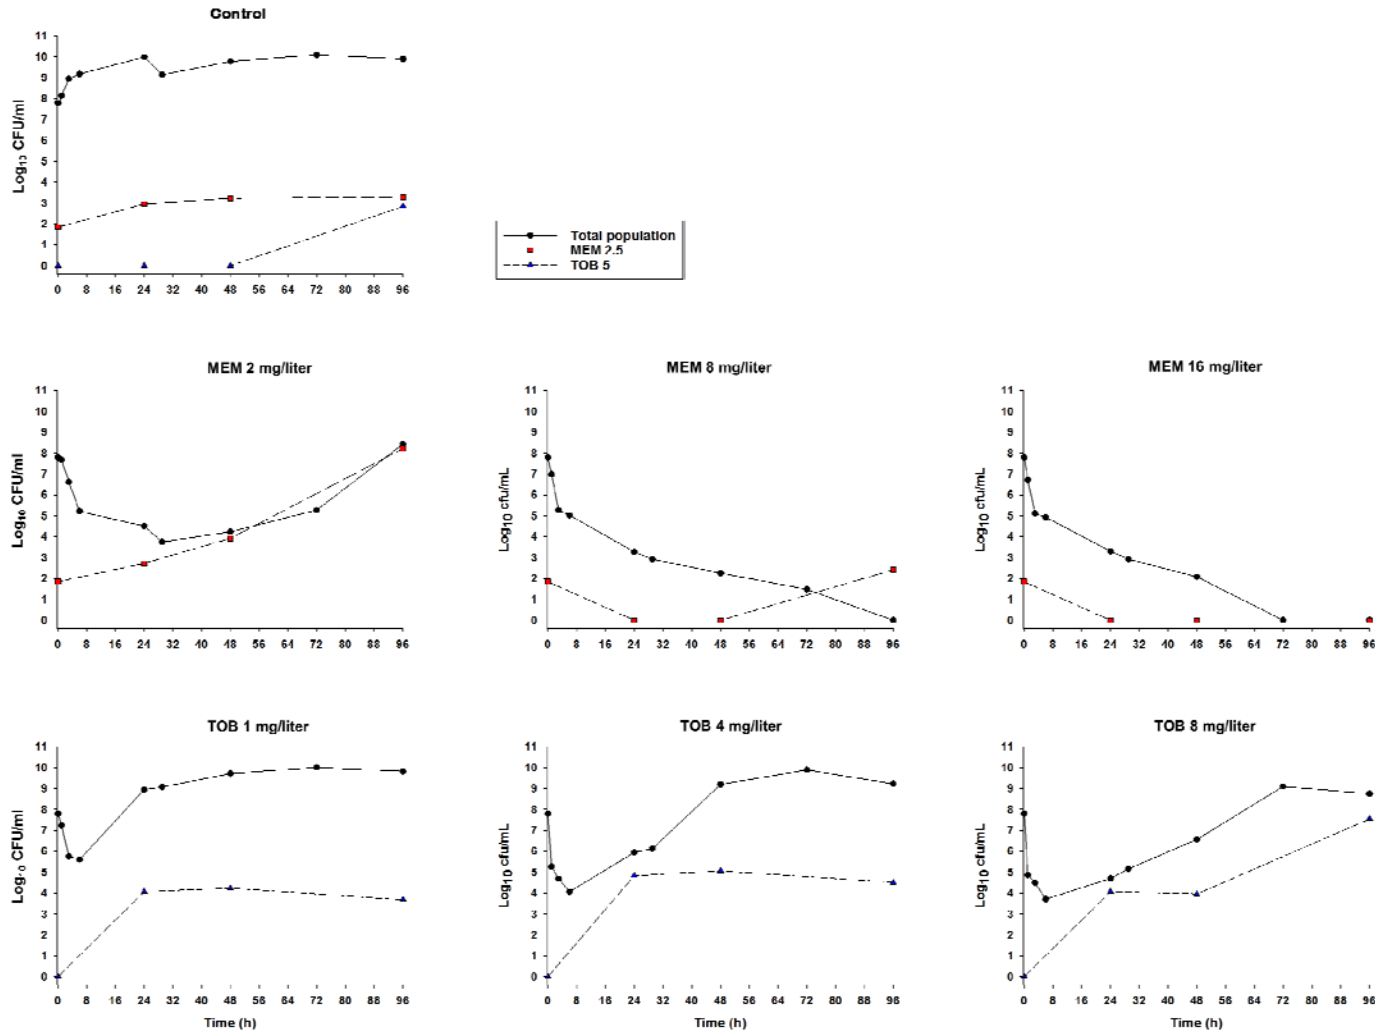

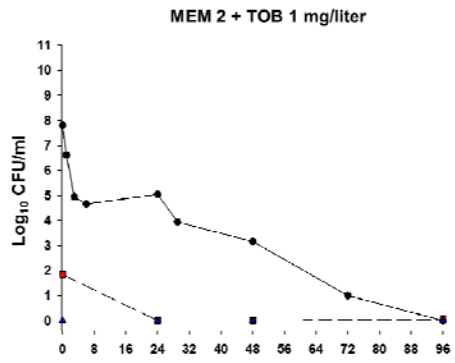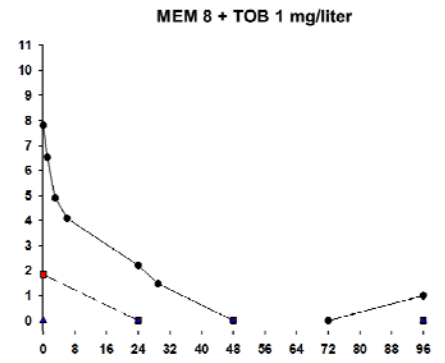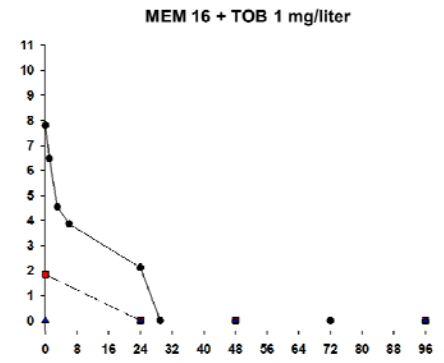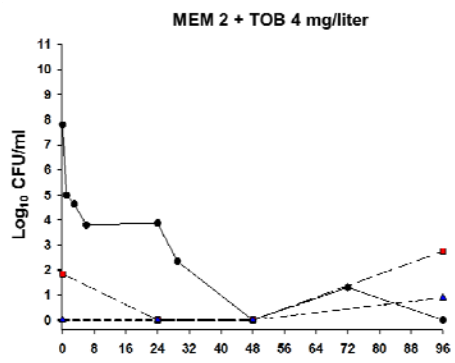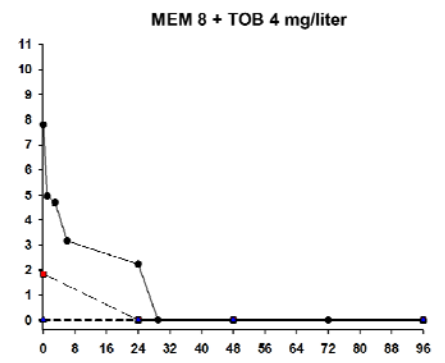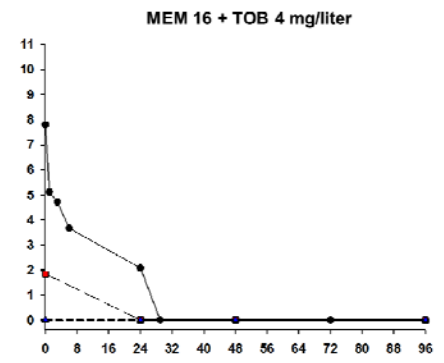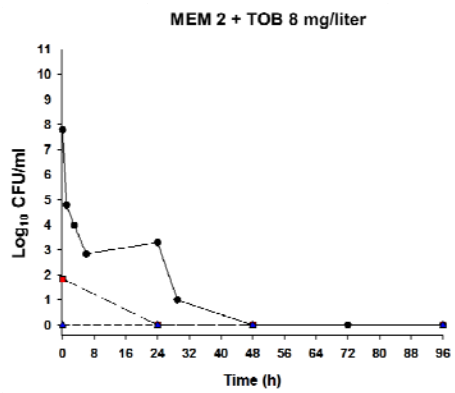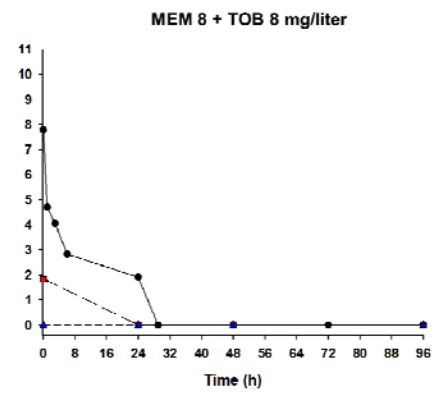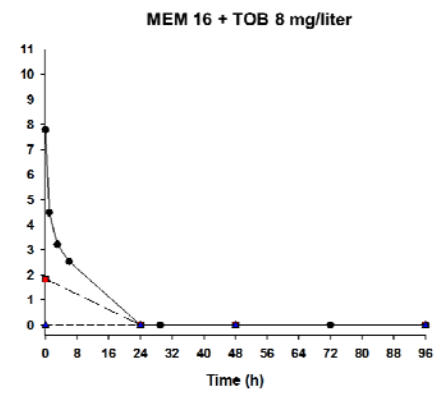

**FIG S2** Time-course of the total and less susceptible bacterial populations (*i.e.* able to grow in the presence of meropenem 2.5 mg/liter or tobramycin 5 mg/liter) of PAO $\Delta$ *mutS* for each concentration (monotherapy and combinations) in the SCTK. MEM, meropenem. TOB, tobramycin.

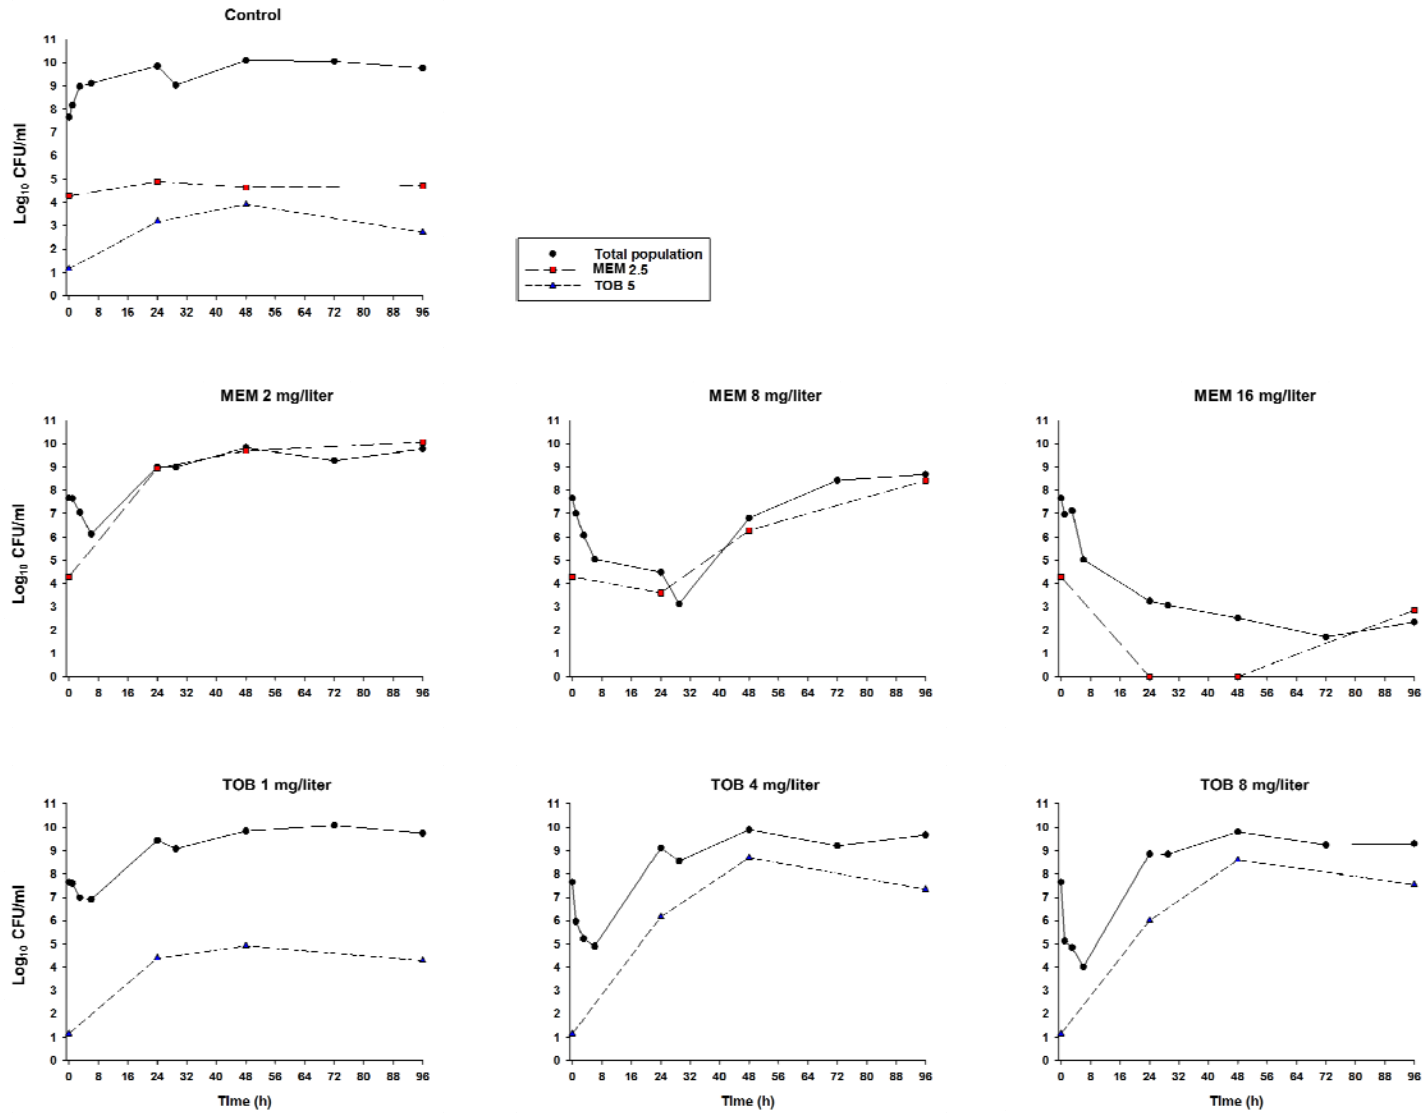

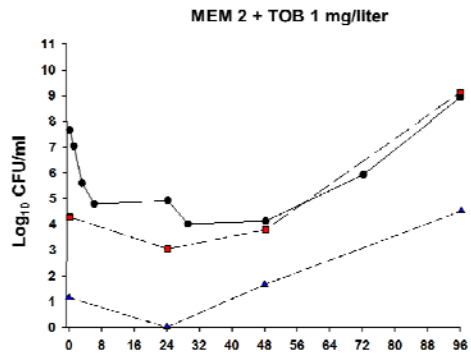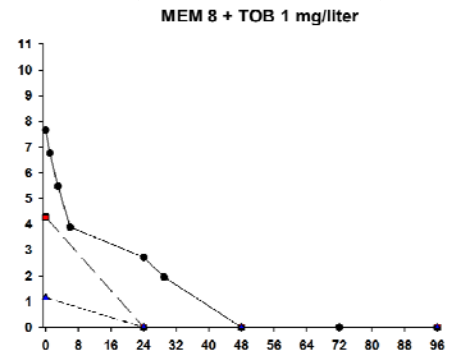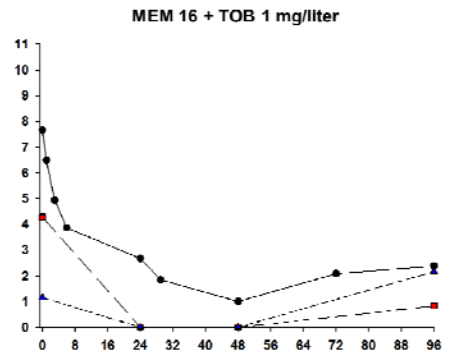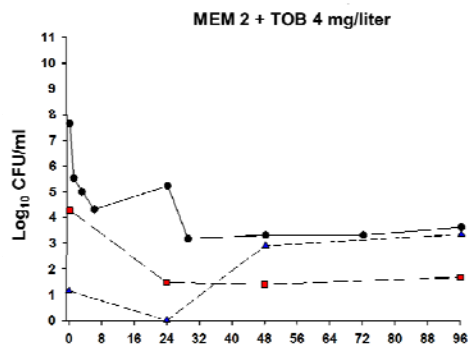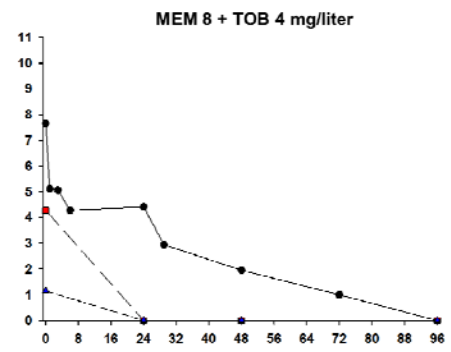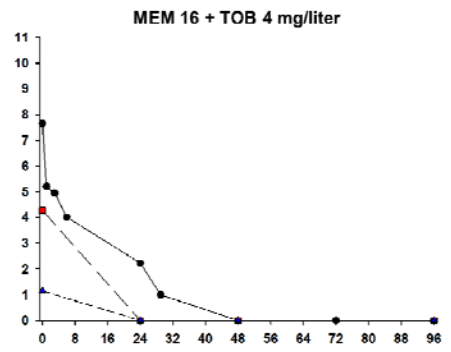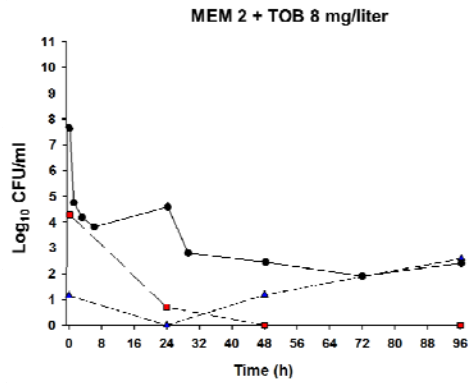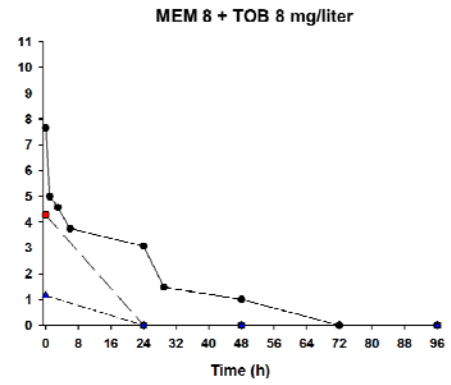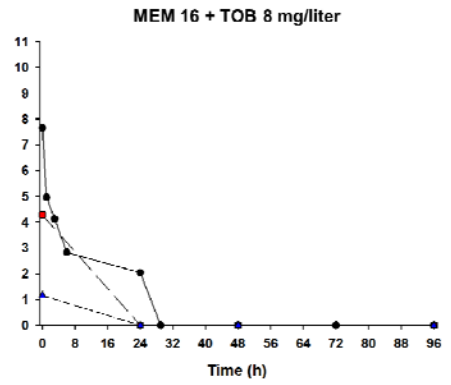

**FIG S3** Observed vs. individual (top) and population fitted (bottom) viable counts of populations that were less susceptible to meropenem and tobramycin. The MBM fitted all viable counts for PAO1 and PAO $\Delta$ *mutS* simultaneously.

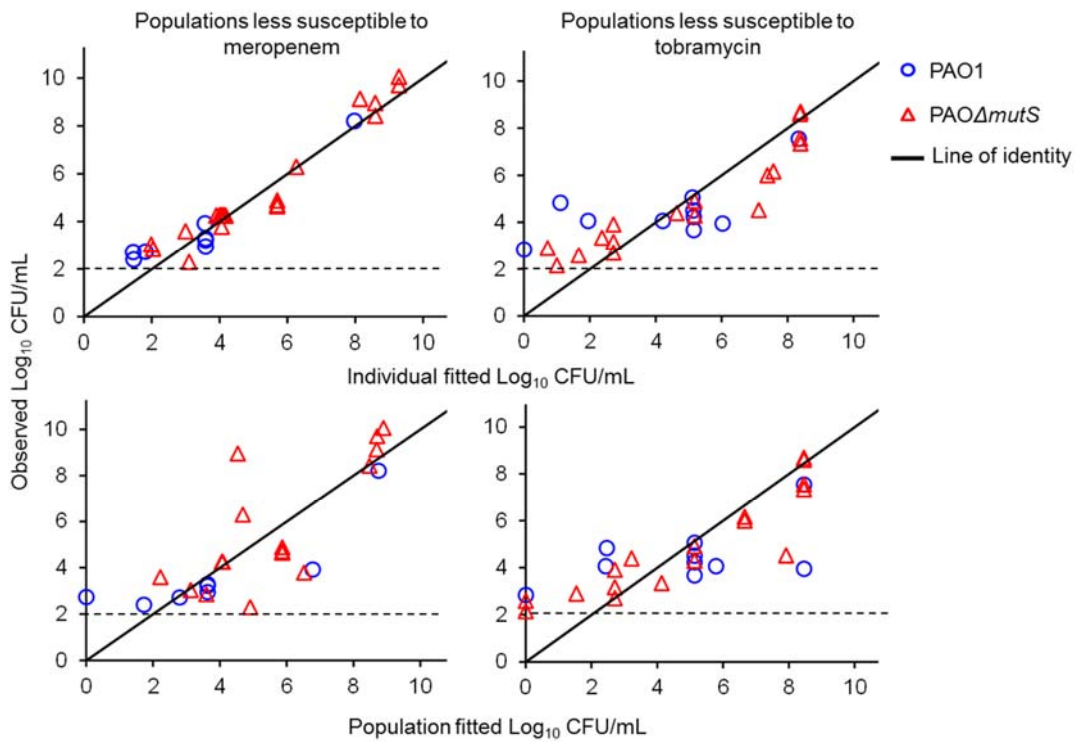

Dashed line: Counts below 100 CFU/mL (<20 colonies/antibiotic-containing plate) are subject to random error due to observing only an integer number of colonies and described by a Poisson error in the observation model.
